# Supplementary material
Source: Springer Nature journal article supplement (https://www.springermedizin.de/resource/supplementary/12894_2011_187_MOESM3_ESM.pdf/9513146)

**A**

EGF stimulation (min): 0 30 90 180 0 30 90 180

rapamycin

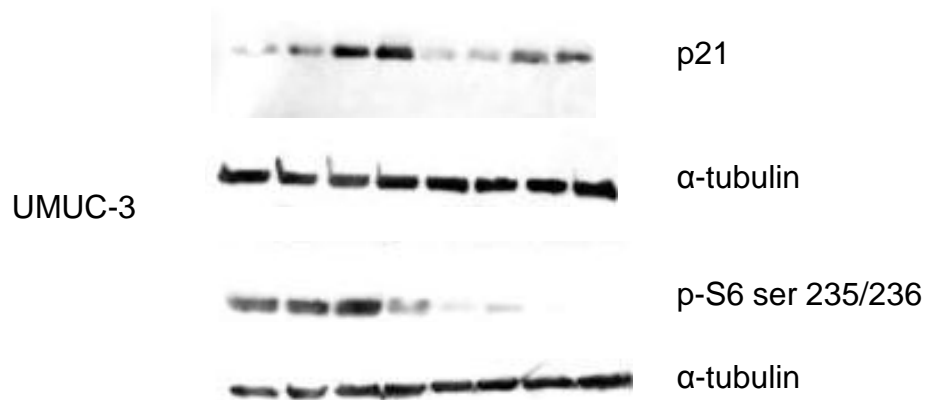**B**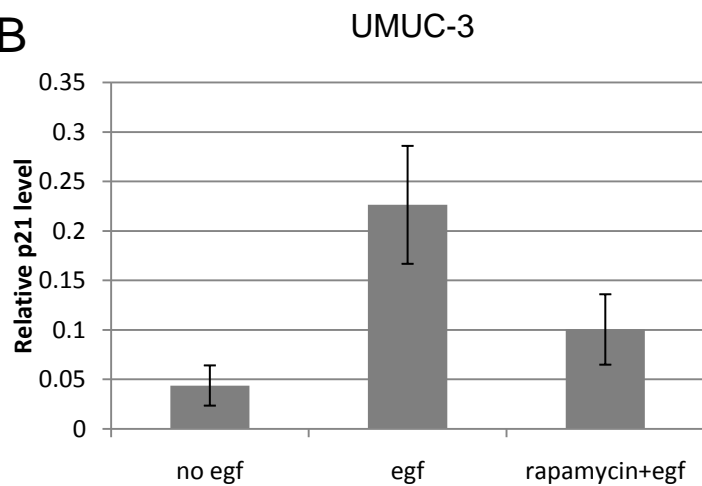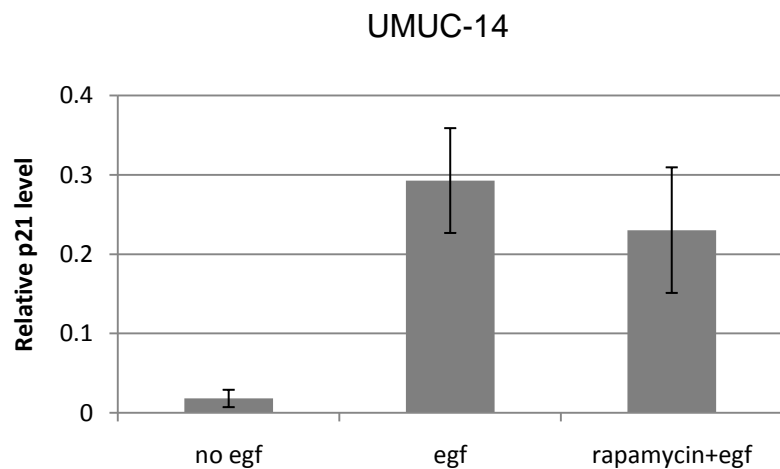

Supplement: MOESM3 [file 9513146]
